# Supplementary material for: Magdalenian and Epimagdalenian chronology and palaeoenvironments at Kůlna Cave, Moravia, Czech Republic
Source: PubMed Central journal article supplement (PMC7746568; doi:10.1007/s12520-020-01254-4), 2020-12-17
Supplement: 12520_2020_1254_MOESM2_ESM.pdf [file 12520_2020_1254_MOESM2_ESM.pdf]

## SI 2: Radiocarbon corrections

Due to the pretreatment of the radiocarbon samples being undertaken at University College London's (UCL's) Institute of Archaeology Isotope Laboratory, it was necessary to apply an additional correction to the dates produced at ORAU (table S2). This was to account for the background carbon of the UCL laboratory, that was potentially introduced into the samples during pretreatment and may be different to that of the ORAU laboratory. Following the standard procedure used at ORAU and using the same two reference samples, aliquots of a cow rib from the Mary Rose shipwreck (relatively recent known aged sample) and the Latton Mammoth long bone (sample of an age beyond radiocarbon measurement) were routinely subject to parallel pretreatment at UCL along with our archaeological samples, and then analysed on the AMS at ORAU. Corrections based on results from these reference samples (Reade et al., 2020a) were calculated according to the method of Wood et al. (2010).

| Sample  | Context                                        | Species and skeletal element           | Date number   | Uncorrected date <sup>14</sup> C BP | Corrected date <sup>14</sup> C BP |
|---------|------------------------------------------------|----------------------------------------|---------------|-------------------------------------|-----------------------------------|
| UPN-102 | Layer 6, sector A, 6a                          | <i>Equus</i> sp., phalange             | OxA-V-2775-57 | 12,865 ± 60                         | 12,910 ± 60                       |
| UPN-120 | Layer 6, sector A, 6g                          | <i>Equus</i> sp., phalange 2           | OxA-V-2777-55 | 12,770 ± 55                         | 12,810 ± 60                       |
| UPN-128 | Layer 5, sector D, III, IV / S, depth 180-190, | <i>Equus</i> sp., metacarpal, proximal | OxA-V-2777-56 | 11,480 ± 50                         | 11,510 ± 50                       |
| UPN-171 | Layer 6, sector G1                             | <i>Rangifer tarandus</i> , humerus     | OxA-V-2793-53 | 12,615 ± 55                         | 12,650 ± 50                       |

Table S2. Original and corrected <sup>14</sup>C BP values for the AMS radiocarbon dated samples reported in this study.

### 18 **SI 3: Peptide mass finger-printing (ZooMS analysis)**

19

20           Seven samples were analysed by peptide mass fingerprinting (ZooMS) to aid  
21 species identification. We analysed two bone samples dated by Nerudová and Neruda  
22 (2014) (OxA-25287 and OxA-25288, both from Layer 5) that had previously been  
23 unidentifiable by macroscopic zooarchaeological analysis. A further five samples were  
24 selected for ZooMS analysis where the distinction between *Cervus elaphus* (red deer) and  
25 *Rangifer tarandus* (reindeer) was uncertain. Three samples from Layer 4 (Epimagdalenian,  
26 Late Glacial Interstadial) were identified by macroscopic zooarchaeological analysis as  
27 reindeer. However, the presence of reindeer, widely considered as a cold climate indicator  
28 species, in the Czech Republic during the Late Glacial Interstadial has not been confirmed  
29 by direct dating. The only evidence for its persistence in the region after the termination of  
30 GS-2.1a comes from the un-dated remains found in Layer 4 at Kůlna Cave (Sommer et al.,  
31 2014). Two of the three Layer 4 samples thought to be reindeer produced  $\delta^{13}\text{C}$  values that  
32 are uncharacteristic of the species (UPN-053  $-20.6\text{‰}$  and UPN-060  $-20.7\text{‰}$ ), while the third  
33 supported the initial reindeer identification (UPN-085,  $-19.3\text{‰}$ ).  $\delta^{13}\text{C}$  values of reindeer  
34 collagen are typically  $>-20\text{‰}$  in Late Pleistocene samples, reflecting lichen in the diet  
35 (Drucker et al., 2010, Bocherens et al., 2015, Jürgensen et al., 2017; Reade et al., 2020b).  
36 Two samples (UPN-096 and UPN-147) from Layer 6 (Magdalenian, GS-2.1a) were identified  
37 by macroscopic zooarchaeological analysis as red deer.  $\delta^{13}\text{C}$  values did not suggest either  
38 of these samples could be reindeer ( $-20.7\text{‰}$  and  $-20.6\text{‰}$ , respectively), but as the presence  
39 of red deer is typically considered an indicator of temperate, wooded environments, these  
40 species were also subjected to ZooMS analysis to confirm the original identification.

41

### 42 **Methodology**

43           ZooMS pretreatment was performed in the preparative laboratory at the Oxford  
44 Radiocarbon Accelerator Unit, and prepared samples sent to the Max Planck Institute for the  
45 Science of Human History in Jena, Germany, for analysis. In all cases, collagen had already  
46 been extracted from specimens for stable isotope analysis and/or radiocarbon dating, so  
47 pretreatment for ZooMS started with prepared collagen. Pretreatment methods are based on  
48 previously published protocols by Buckley et al. (2009) and Coutu et al. (2016).  
49 Approximately 100–200  $\mu\text{g}$  of dry collagen was dissolved in 100  $\mu\text{L}$  of 50 mM solution of  
50 ammonium bicarbonate (CAS 1066-33-7, Fisher Scientific, 99%) in ultrapure water. A 50  $\mu\text{L}$   
51 aliquot of the sample solution was transferred to a low protein binding polypropylene  
52 microcentrifuge tube (Fisher Scientific), and 1  $\mu\text{L}$  of trypsin solution (Promega UK,  
53 sequencing-grade modified trypsin in acetic acid buffer) added. Samples were heated at

54 37°C overnight, for 12–18 h. The remainder of the collagen solution was stored at –50°C in  
55 case a second measurement was required.

56 After samples were removed from the oven, 10 µL of a 0.5% solution of  
57 trifluoroacetic acid (CAS 76-05-1, Fisher, HPLC grade 99+%) in ultrapure water was added  
58 to each tube to stop the digestion reaction. Solid phase extraction (SPE) was done using a  
59 96-well SPE cartridge plate (Supelco Discovery® DSC-18) if dozens of samples were being  
60 prepared, or SPE pipette tips (Pierce™ C18 Tips) for only a few samples. In either case, the  
61 SPE phase was first conditioned with 600 µL of a solution of 0.1% TFA in a mixture of 50%  
62 acetonitrile (CAS 75-05-8, Sigma-Aldrich, ACS reagent ≥99.5%) and ultrapure water. The  
63 SPE resin was further washed with 0.1% TFA in ultrapure water. Next, 50 µL of the digested  
64 sample was loaded onto the resin, and washed with two 600 µL aliquots of 0.1% TFA in  
65 ultrapure water. The sample was eluted with 200 µL of 0.1% TFA in 50% acetonitrile:water.  
66 Samples were then left loosely capped in the fume cupboard for up to 20 h so that the  
67 solvent could evaporate.

68 Dry samples were re-suspended in 10 µL of 0.1% TFA, and 0.5 µL of sample was  
69 spotted onto the target plate along with 0.5 µL of a matrix solution, 10% *α*-cyano-4-  
70 hydroxycinnamic acid (CAS 28166-41-8, Sigma-Aldrich >99%) in ultrapure water. Plates were  
71 sent to the Max Planck Institute for the Science of Human History in Jena, Germany, for  
72 analysis on their Bruker Ultraflex II (Bruker Daltonics, Bremen) MALDI-TOF/TOF mass  
73 spectrometer. Three spectra were collected for each sample, averaged, and analysed using  
74 mMass software (Niedermeyer and Strohal, 2012). The averaged spectra for each sample  
75 were compared to a reference database containing collagen-peptide marker masses for  
76 numerous animal genera to enable identification (Buckley et al., 2009; Welker et al., 2016).

77

## 78 **Results and Discussion**

79 Results from ZooMS analysis are shown in Table S3.1 and Figure S3.1. The results  
80 can be considered alongside macroscopic zooarchaeological analysis and  
81 archaeological/stratigraphical context to provide a most probable identification for each  
82 sample (Table S3.2).

83 Of the two samples that have been radiocarbon dated but are unidentified, the  
84 ZooMS spectra for UPN-166 (OxA-25288 12,600 ± 60 BP) identifies the sample belonging to  
85 the Equidae family, with the most probable identification being of the genus *Equus*. The  
86 ZooMS spectra for UPN-165 (OxA-25287 11,010 ± 50 BP) provides an identification to the  
87 Cervidae or Bovidae family, with the exclusion of the *Bos* and *Bison* genera (based on the F  
88 peptide) and *Rangifer* genus (based on the G peptide). Given the proportion of species  
89 belonging to the Cervidae and Bovidae family in the faunal assemblage of Layer 5, we  
90 suggest elk (*Alces alces*) or red deer is the most likely identification of this bone. Stable

91 isotope values for UPN-165 are 5.2‰ for  $\delta^{15}\text{N}$ , -20.4‰ for  $\delta^{13}\text{C}$ , and -2.1‰ for  $\delta^{34}\text{S}$ , making  
92 it isotopically indistinguishable from the range of values observed in the other analysed elk  
93 and red deer samples (Figure S3.2).

94 ZooMS analysis of the Layer 4 samples UPN-053 and UPN-060 rule out the  
95 possibility of either being reindeer (based on the G peptide), which corroborates the  
96 interpretation of the  $\delta^{13}\text{C}$  results. ZooMS results indicate that both samples belong to either  
97 the Cervidae or Bovidae family, with the exclusion of the *Bos*, *Bison* and *Rangifer* genera.  
98 As with UPN-165, the most likely species in the context of Kůlna Layer 4 are red deer or elk.  
99 ZooMS analysis of the third reindeer sample for Layer 4 (UPN-085) confirmed its  
100 macroscopic zooarchaeological identification as *Rangifer*. However, without direct dating of  
101 the sample we cannot substantiate whether this demonstrates the presence of reindeer  
102 during the latter part of the Late Glacial Interstadial in Central Europe, or if it demonstrates  
103 the presence of an older, intrusive sample in the Layer 4 assemblage; both interpretations  
104 are possible.

105 ZooMS analysis of UPN-096 and UPN-147 from Layer 6 indicated both samples  
106 belong to either the Cervidae or Bovidae family, with the exclusion of the *Rangifer* genus.  
107 For sample UPN-096 *Bos* and *Bison* can also be excluded. While the ZooMS results do not  
108 permit the exclusion of *Bos* and *Bison* for UPN-147, this identification can be ruled out based  
109 on macroscopic zooarchaeological results; the M<sub>3</sub> tooth is clearly of large Cervid  
110 morphology. Based on this, we have no reason to reclassify UPN-096 and UPN-147 from  
111 their original identification as red deer, but we are unable to determine whether these  
112 samples represent red deer presence at Kůlna during GS-2.1a, or if they could represent  
113 younger, intrusive material from overlying levels. However, the presence of red deer in the  
114 Moravian Karst during GS-2.1a is not exceptional and it is found in several of the Late  
115 Pleistocene layers at Kůlna Cave (Zelinková, 1998). The presence of red deer in the  
116 Moravian Karst during colder periods of the Late Pleistocene may have been facilitated by  
117 more temperate microclimatic conditions specific to the karstic landscape, which likely  
118 offered localised pockets of woodland habitat (Nerudová et al., 2016).

119

120

| Sample  | P1     | A      | A'     | B      | C      | P2     | D      | E      | F      | F'     | G      | G'     | ZooMS ID                                                           |
|---------|--------|--------|--------|--------|--------|--------|--------|--------|--------|--------|--------|--------|--------------------------------------------------------------------|
| UPN-053 | 1105.4 |        |        | 1427.5 |        | 1648.6 | 2131.8 | 2792.9 | 2883   | 2899   | 3017.1 | 3033.1 | Cervidae/Bovidae (excluding <i>Bos/Bison</i> and <i>Rangifer</i> ) |
| UPN-060 | 1105.4 |        |        | 1427.5 | 1550.5 | 1648.6 | 2131.8 | 2792.9 | 2883   | 2899   | 3017.1 | 3033.1 | Cervidae/Bovidae (excluding <i>Bos/Bison</i> and <i>Rangifer</i> ) |
| UPN-085 | 1105.5 | 1150.6 | 1166.6 | 1427.7 | 1580.8 | 1648.8 | 2131   |        | 2883.4 |        |        | 3093.4 | Rangifer                                                           |
| UPN-096 | 1105.5 | 1180.5 | 1196.4 | 1427.6 | 1550.6 | 1648.6 | 2131.9 | 2792   | 2883.1 | 2899.1 | 3017.1 | 3033.2 | Cervidae/Bovidae (excluding <i>Bos/Bison</i> and <i>Rangifer</i> ) |
| UPN-147 | 1105.5 |        |        | 1427.5 |        |        | 2131.8 |        | 2883.1 |        | 3017.1 | 3033.2 | Cervidae/Bovidae (excluding <i>Bos/Bison</i> and <i>Rangifer</i> ) |
| UPN-165 | 1105.5 |        |        | 1427.6 |        | 1648.6 | 2131.8 | 2792.9 | 2883.1 | 2899.1 | 3017.1 | 3033.1 | Cervidae/Bovidae (excluding <i>Bos/Bison</i> and <i>Rangifer</i> ) |
| UPN-166 | 1105.4 |        |        | 1427.5 |        |        | 2145.8 | 2820.9 | 2883.1 |        | 2983.1 | 2999.1 | Equidae                                                            |

121 Table S3.1 ZooMS results. Columns P1 to G' indicate identified peaks in the mass spectra. ZooMS identification is based on these peaks

122

| Sample number | Date code | Date     | Macroscopic zooarchaeological identification | ZooMS identification                                               | Most probable identification <sup>1</sup> |
|---------------|-----------|----------|----------------------------------------------|--------------------------------------------------------------------|-------------------------------------------|
| UPN-053       | undated   |          | <i>Rangifer tarandus</i>                     | Cervidae/Bovidae (excluding <i>Bos/Bison</i> and <i>Rangifer</i> ) | <i>Alces alces/Cervus elaphus</i>         |
| UPN-060       | undated   |          | <i>Rangifer tarandus</i>                     | Cervidae/Bovidae (excluding <i>Bos/Bison</i> and <i>Rangifer</i> ) | <i>Alces alces/Cervus elaphus</i>         |
| UPN-085       | undated   |          | <i>Rangifer tarandus</i>                     | <i>Rangifer</i>                                                    | <i>Rangifer tarandus</i>                  |
| UPN-096       | undated   |          | <i>Cervus elaphus</i>                        | Cervidae/Bovidae (excluding <i>Bos/Bison</i> and <i>Rangifer</i> ) | <i>Cervus elaphus</i>                     |
| UPN-147       | undated   |          | <i>Cervus elaphus</i>                        | Cervidae/Bovidae (excluding <i>Bos/Bison</i> and <i>Rangifer</i> ) | <i>Cervus elaphus</i>                     |
| UPN-165       | OxA-25287 | 11010±50 | unidentified                                 | Cervidae/Bovidae (excluding <i>Bos/Bison</i> and <i>Rangifer</i> ) | <i>Alces alces/Cervus elaphus</i>         |
| UPN-166       | OxA-25288 | 12600±60 | unidentified                                 | Equidae                                                            | <i>Equus</i> sp.                          |

124 Table S3.2 Most probable identification based on macroscopic zooarchaeological, ZooMS and stable isotope results, and  
125 archaeological/stratigraphic context.

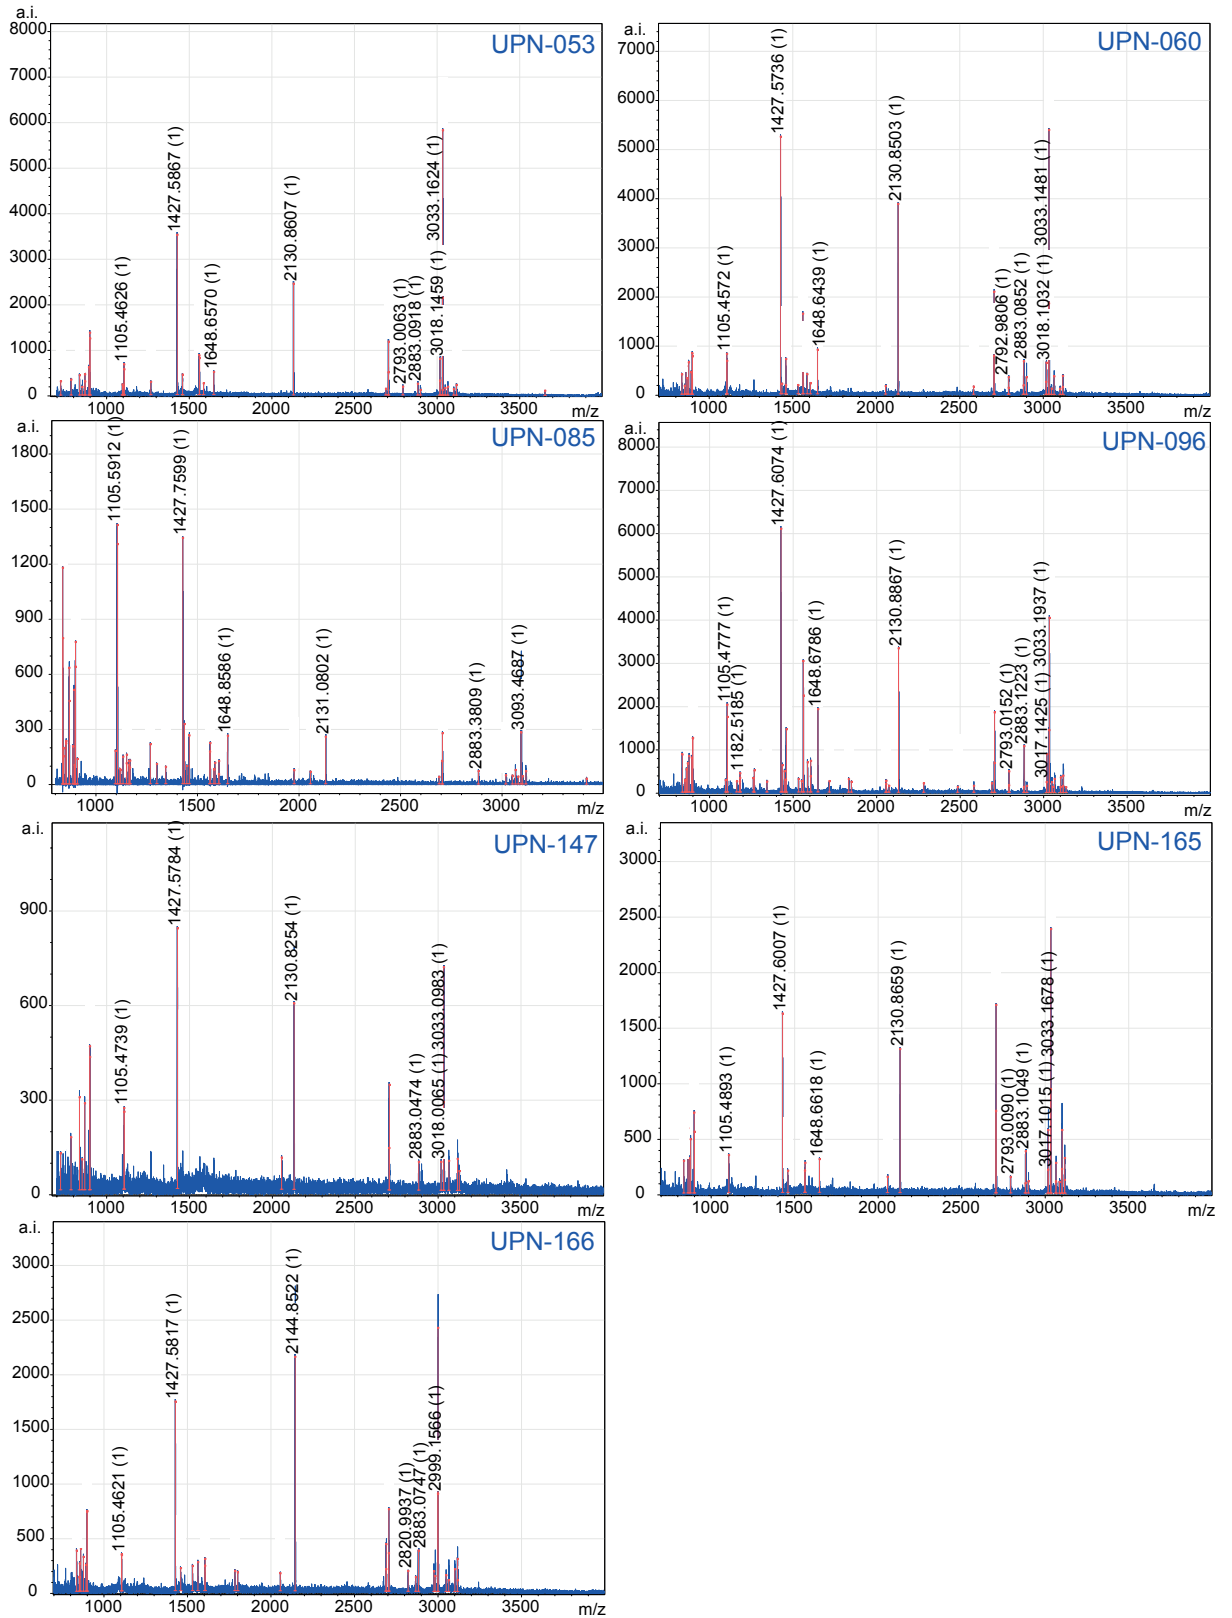

126  
 127  
 128  
 129  
 130

Figure S3.1 Averaged mass spectra for each sample with the peaks used for identification indicated.

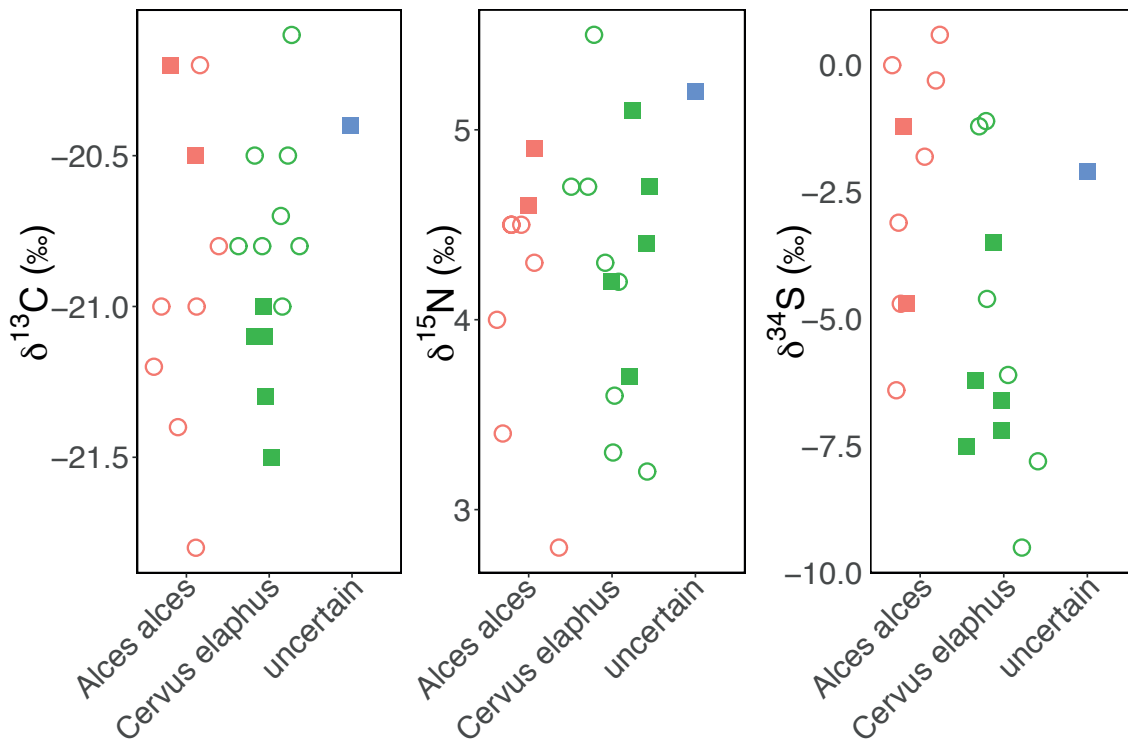

131

132 Figure S3.2 δ<sup>13</sup>C (left), δ<sup>15</sup>N (middle), and δ<sup>34</sup>S (right) values from *Alces alces* (red) and  
 133 *Cervus elaphus* (green) samples from Layer 4 (open circles) and Layer 5 (closed squares),  
 134 compared to the dated sample of unknown species (UPN-165, OxA-25287, blue square)

135

136



137 **SI 4: Bayesian age model of Kùlna Cave radiocarbon dates**

138 The chronology of activity at Kùlna Cave was investigated using a simple phase model  
 139 based on Bayes theorem and run in OxCal4.4. The limited number of radiocarbon dates  
 140 available for analysis restricts the development of a more rigorous chronological model.  
 141 Initially, a simple 3 phase model was tested, with the prior assumption that dates from  
 142 Layers 6, 5 and 4 represented different phases of activity at the site, but that dates within  
 143 each layer represent a single phase. The model showed poor agreement with these  
 144 assumptions (Model Agreement Index = 0.0%), indicating with high probability that some of  
 145 the radiocarbon dates included in the model were not assigned to their correct stratigraphic  
 146 provenance. A second model was run using only the Layer 6 and Layer 4 data, again  
 147 assuming that the two layers represented different phases of activity at the site, but that  
 148 dates within each layer represent a single phase. This model showed good agreement with  
 149 these assumptions (Individual Agreement Indices ranged from 86.1 – 112.0, while the Model  
 150 Agreement Index was 104.1%; a value of over 60% is typically considered to represent good  
 151 agreement with the prior assumptions). Based on the output from this model (table S4.1) a  
 152 likely duration of activity at the cave represented in Layer 6 and 4 can be inferred.

153

|                | Modelled age (cal. BP) |        |                  |        | Individual Agreement Index |
|----------------|------------------------|--------|------------------|--------|----------------------------|
|                | 68.2% confidence       |        | 95.4% confidence |        |                            |
|                | from                   | to     | from             | to     |                            |
| Start Layer 6  | 15,625                 | 15,270 | 16,055           | 15,117 |                            |
| OxA-25290      | 15,093                 | 14,890 | 15,175           | 14,590 | 110.2                      |
| OxA-25289      | 15,110                 | 14,918 | 15,195           | 14,623 | 112                        |
| OxA-V-2775-57C | 15,453                 | 15,242 | 15,578           | 15,146 | 86.1                       |
| UPN-171        | 15,130                 | 15,000 | 15,203           | 14,941 | 101.3                      |
| End Layer 6    | 15,016                 | 14,611 | 15,084           | 14,174 |                            |
|                |                        |        |                  |        |                            |
| Start Layer 4  | 14,135                 | 13,659 | 14,657           | 13,605 |                            |
| OxA-25284      | 13,743                 | 13,602 | 13,785           | 13,519 | 99.4                       |
| OxA-25285      | 13,742                 | 13,513 | 13,760           | 13,502 | 100.1                      |
| OxA-25286      | 13,090                 | 12,974 | 13,101           | 12,891 | 103                        |
| End Layer 4    | 13,062                 | 12,681 | 13,094           | 11,959 |                            |

154

155 Table S4.1 Model output with agreement indices for a two-phase model using radiocarbon  
 156 dates from Layers 4 and 6. Model was run in OxCal4.4 using the IntCal20 timeline, with the  
 157 code given below.

158

159 OxCal code for model:

```
160 Plot()
161 {
162   Sequence()
163   {
164     Boundary("Start Layer 6");
165     Phase("Layer 6")
166     {
167       R_Date("OxA-25290", 12555, 60);
168       R_Date("OxA-25289", 12575, 60);
169       R_Date("OxA-V-2775-57C", 12910, 60);
170       R_Combine("UPN-171")
171       {
172         R_Date("OxA-25291", 12620, 60);
173         R_Date("OxA-V-2793-53C", 12650, 50);
174       };
175     };
176     Boundary("End Layer 6");
177     Boundary("Start Layer 4");
178     Phase("Layer 4")
179     {
180       R_Date("OxA-25284", 11820, 50);
181       R_Date("OxA-25285", 11770, 55);
182       R_Date("OxA-25286", 11070, 50);
183     };
184     Boundary("End Layer 4");
185   };
186 };
187
188
```

189 **SI 5 Exploration of isotope data by excavation sector**

190

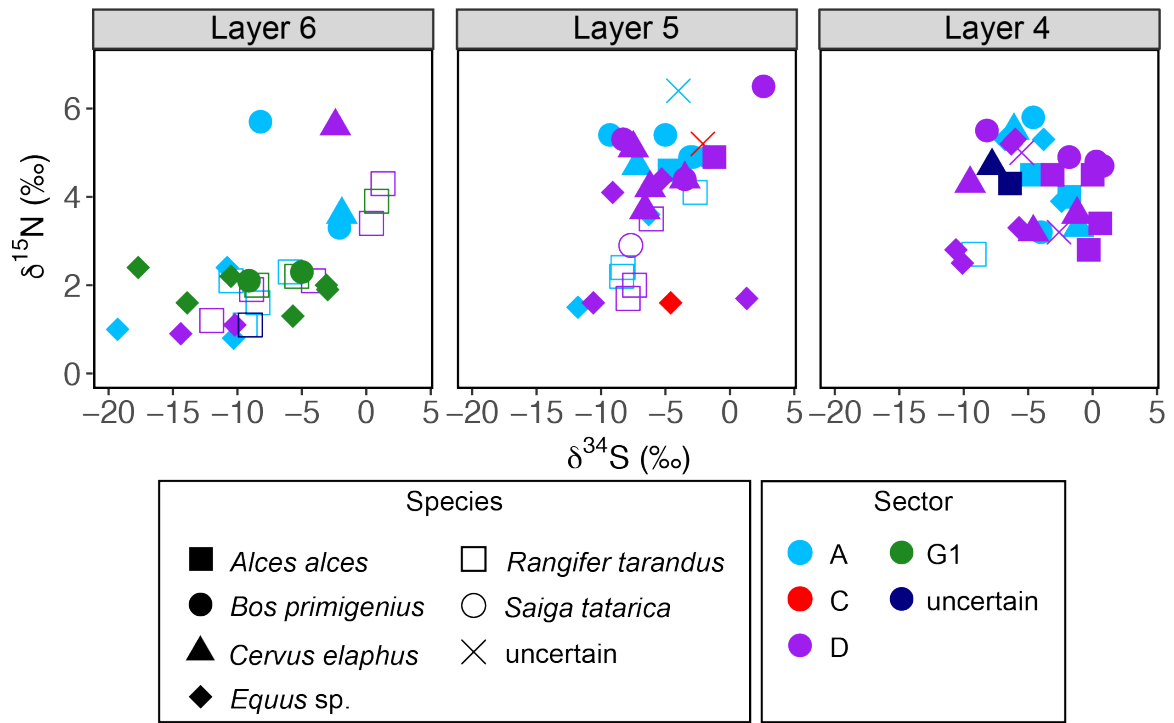

191

192

193 Figure S5.1  $\delta^{15}\text{N}$  versus  $\delta^{34}\text{S}$  values from Layer 6 (left), Layer 5 (middle) and Layer 4 (right)

194 samples. Colours indicate excavation sector and symbols indicate species. No relationship

195 is observed between excavation sector and the isotopic data.

196

197

198

199 **SI 6 Hierarchal cluster analysis of isotope data**

200 Hierarchical cluster analysis was undertaken to explore grouping of samples based on  $\delta^{15}\text{N}$   
201 and  $\delta^{34}\text{S}$  values. Where the C/N, C/S or N/S ratio for a sample did not fall within the range  
202 considered to indicate well preserved collagen, the sample's  $\delta^{15}\text{N}$  and  $\delta^{34}\text{S}$  values were  
203 excluded from the analysis (Ambrose, 1990; DeNiro, 1985; Nehlich and Richards, 2009). A  
204 hierarchical approach was favoured over a non-hierarchical approach as it makes no prior  
205 assumptions on how many groupings should exist in the data.  $\delta^{15}\text{N}$  and  $\delta^{34}\text{S}$  data were  
206 normalised to have a mean of 0 and standard deviation of  $\pm 1$ . Divisive (top-down, DIANA)  
207 and agglomerative (bottom-up, AGNES) approaches were investigated. All approaches  
208 produced coefficients close to 1, regardless of the linkage method used, indicating strong  
209 clustering in the data (table S4.2). The agglomerative approach using Ward's minimum  
210 variance method was selected as it displayed the highest coefficient. The optimum  
211 number of clusters in the data was determined as 2 using the average silhouette width  
212 method (figure S4.2). Results of this analysis show strong clustering of Layer 4 and Layer  
213 6 samples into distinct groups, while Layer 5 samples are more evenly distributed  
214 between the two sample groups (figure S4.3).

215

| Method      | DIANA  | AGNES<br>single | AGNES<br>complete | AGNES<br>average | AGNES<br>Ward |
|-------------|--------|-----------------|-------------------|------------------|---------------|
| coefficient | 0.9618 | 0.8456          | 0.9622            | 0.9072           | 0.9841        |

216

217 Table S6.1 Coefficients of the clustering methods considered. The AGNES Ward (Ward's  
218 minimum variance) method produced a coefficient closest to 1 and was selected for  
219 subsequent analysis.

220

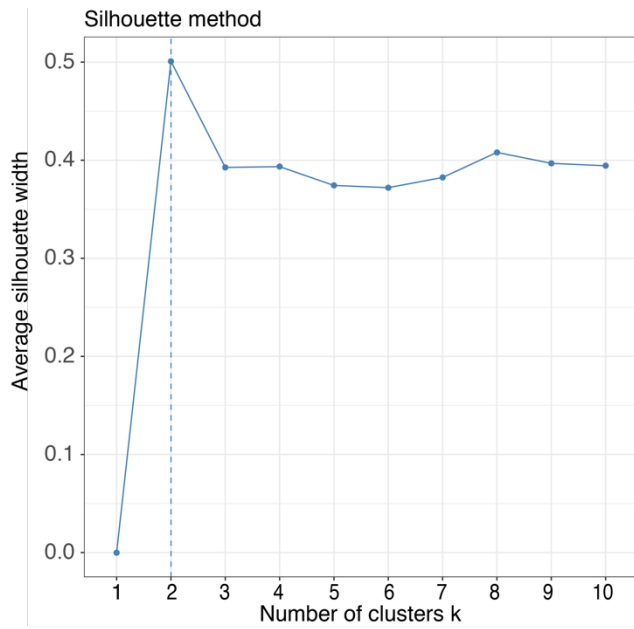

221

222 Figure S6.1 Silhouette method output, used to determine the optimum number of clusters in  
223 the data. Average silhouette width indicates 2 clusters in the data.

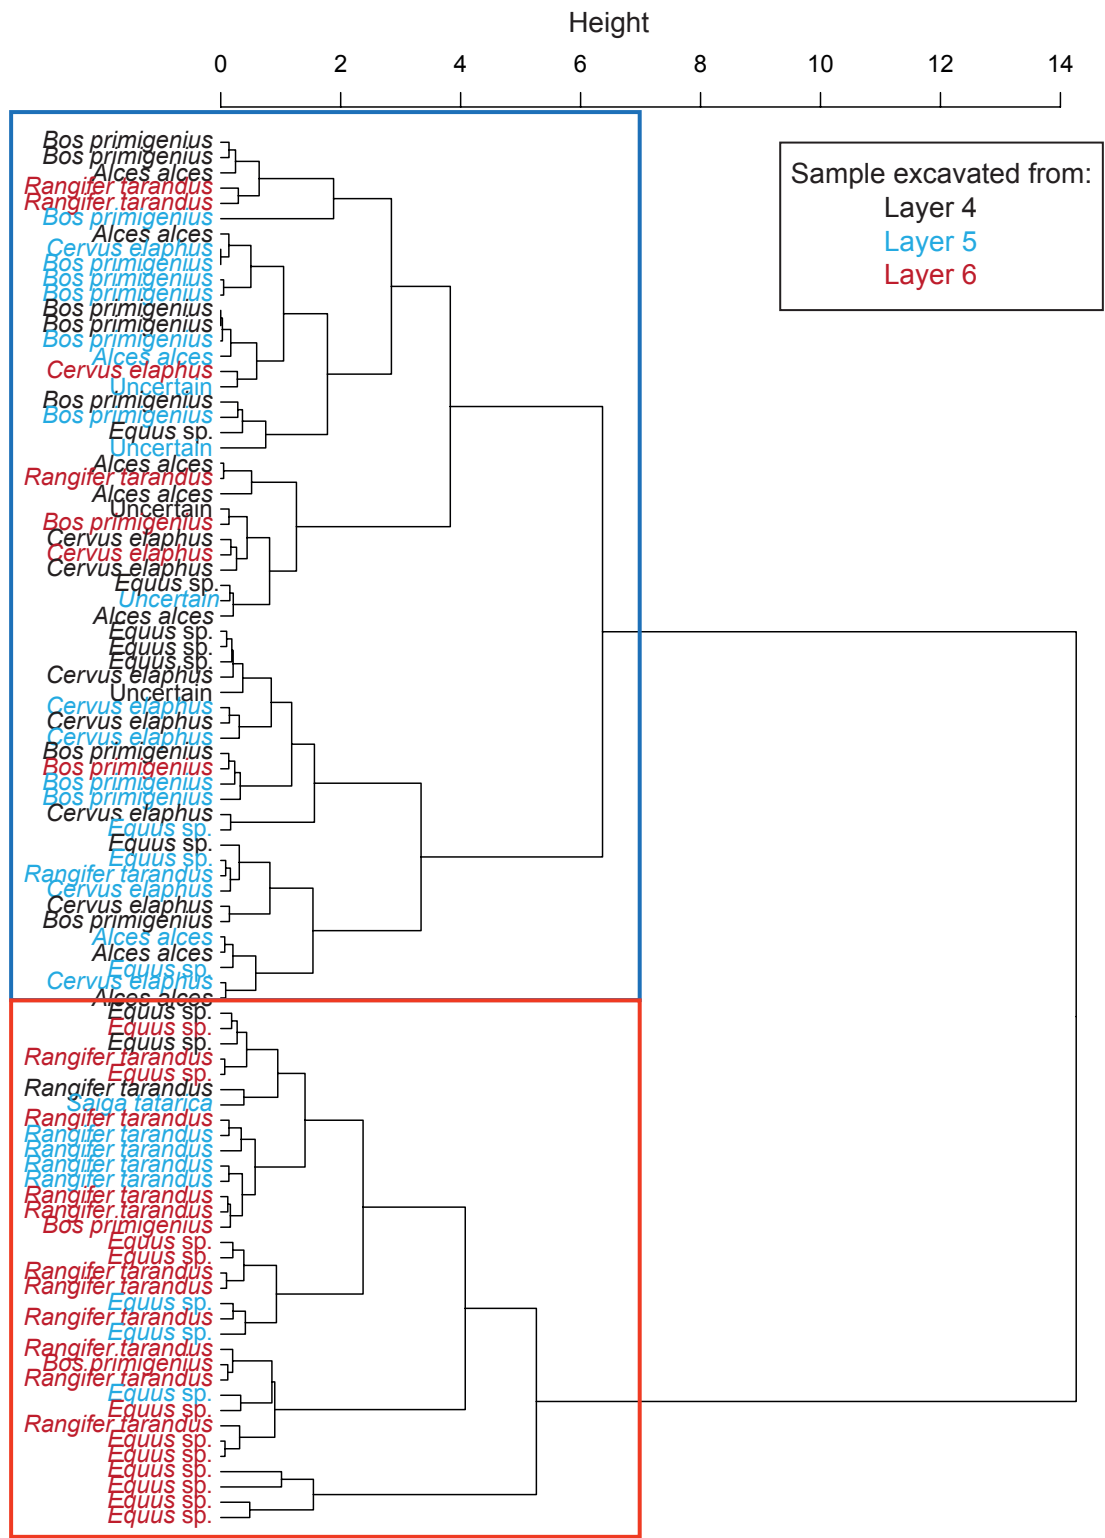

224

225

226

227

228

229

230

Figure S6.2 Dendrogram showing the clusters of samples based on their  $\delta^{15}\text{N}$  and  $\delta^{34}\text{S}$  values (clusters indicated by red and blue boxes). Each sample is labelled by its species attribution and the colour of the text indicates the layer the sample was excavated from (black = Layer 4, blue = Layer 5, red = Layer 6). The cluster analysis shows the majority of Layer 4 and Layer 6 samples falling into different clusters from one another, while the Layer 5 samples are more evenly distributed between the two clusters.

## 231 **SI 7 Age models for Švarcenberk Lake and Vracov in Figure 6**

232 Previous age model constructions for Švarcenberk and Vracov pollen records are  
233 available from the Czech Quaternary Palynological Database (Kuneš et al., 2009) and  
234 references there in, which use the IntCal13 radiocarbon calibration curve (Reimer et al.,  
235 2013). To allow accurate comparisons between the timing of regional environmental  
236 changes presented in these pollen records and that of Kůlna Cave, the ages for these pollen  
237 records were updated in this study.

238 Simple age models were constructed for Švarcenberk and Vracov using OxCal v4.4  
239 (Bronk Ramsey, 2009a) and the updated IntCal20 radiocarbon calibration curve (Reimer et  
240 al., 2020). Both these new age models used the *P\_Sequence* deposition model as outlined  
241 in Bronk Ramsey (2008). A model averaging approach was taken such that the programme  
242 was able to objectively derive the optimal variability in sedimentation rate based upon the  
243 radiocarbon dates themselves (Bronk Ramsey and Lee, 2013). A  $k$  value of  $1.0\text{cm}^{-1}$  was  
244 used with two orders of magnitude for each site ( $0.01\text{-}100\text{cm}^{-1}$ ). This allowed flexibility with a  
245 variable sedimentary rate within the models (Bronk Ramsey, 2008). A *General*  
246 *Outlier\_Model* with a prior probability of 5% was applied to every radiocarbon date (Bronk  
247 Ramsey, 2009b). This results in down-weighting of dates considered to be outliers within the  
248 model rather than excluding them manually. Though, if radiocarbon dates were obviously too  
249 young or too old for the depth in the sequence, and that the model could not run, these  
250 dates were manually removed. Each record's age model had a *Boundary* applied to the  
251 base and top of the record, related to the lowest and highest core depth outlined in each  
252 site's relevant publication. For the Core top *Boundary* of Vracov, to stop the model results  
253 extending the ages into the future, the *Date* function was applied to when the core was  
254 believed to have been original recovered (Svobodová, 1992). This addition does not affect  
255 the Late Glacial ages at the base of the core, the focus of this study.

256

### 257 **Švarcenberk Lake, Bohemia**

258 The age model consisted of six radiocarbon dates reported in table S7.1, as  
259 published in Pokorný (2002) and Kuneš et al. (2009). *Boundaries* were applied to the depths  
260 of 'core base' and 'core top' as outlined in Pokorný (2002). The outlier analysis results  
261 showed no dates were rejected or down-weighted in the model.

262

### 263 **Vracov, Moravia**

264 This age model consisted of eleven radiocarbon dates seen in table S7.1. However,  
265 the three lowest radiocarbon dates (Hv-18599, Beta364949 and Poz-51954) were manually  
266 excluded from this study's age model due to these ages being consistently too young for the  
267 depth of the record resulting in the age model having problems converging and running fully.

268 This is in agreement with Kuneš et al. (2015) and could be linked to post-depositional  
269 reworking. The remaining radiocarbon dates were not rejected or downweighted in the  
270 resulting model from this study. Comparisons to the previous age model for Vracov by  
271 Kuneš et al. (2015) shows that this present study has older ages with larger age  
272 uncertainties. This is due to the age model of Kuneš et al. (2015) prescribing strict prior  
273 accumulation rate of 20yrs/cm compared to this study's variability in sedimentation rate,  
274 allowing for fluctuations in the deposition rate throughout the record. The choice for  
275 20yrs/cm by Kuneš et al. (2015) may be too rigid for Late Glacial age sediments. In addition,  
276 the lack of accepted radiocarbon dates in the older part of the record resulted in older ages  
277 and uncertainty as the OxCal model extrapolated between the 'Core base' and the lowest  
278 radiocarbon date of Poz-51952. This is in addition to the different calibration curves used by  
279 this study and Kuneš et al. (2015).

280

281



| Site        | Sample depth (cm) | Laboratory number                     | Material dated                      | Method      | Radiocarbon age ( <sup>14</sup> C years BP) | Used in age models? | Reference                   |
|-------------|-------------------|---------------------------------------|-------------------------------------|-------------|---------------------------------------------|---------------------|-----------------------------|
| Švarcenberk | 150-153           | LuA-4588                              | Woody stem fragments                | AMS         | 4650 ± 100                                  | Yes                 | Pokorny and Jankovska, 2000 |
|             | 324-327           | LuA-4589                              | <i>Trapa natans</i> nut             | AMS         | 6350 ± 100                                  | Yes                 | Pokorny, 2002               |
|             | 390-393           | LuA-4590                              | Woody stem fragment                 | AMS         | 9640 ± 115                                  | Yes                 | Pokorny, 2002               |
|             | 520-523           | LuA-4591                              | Bulk gyttja sample                  | AMS         | 10780 ± 115                                 | Yes                 | Pokorny, 2002               |
|             | 680-683           | LuA-4738                              | Alkali-soluble fraction from gyttja | AMS         | 11750 ± 120                                 | Yes                 | Pokorny, 2002               |
|             | 985-995           | LuA-4737                              | <i>Salix</i> twigs                  | AMS         | 12800 ± 120                                 | Yes                 | Kuneš et al., 2009          |
| Vracov      | 39.5-40.5         | Poz-51951                             | Seeds of <i>Carex</i>               | AMS         | 670 ± 30                                    | Yes                 | Kunes et al., 2015          |
|             | 124.5-125.5       | Poz-51947                             | Plant remains                       | AMS         | 1870 ± 50                                   | Yes                 | Kunes et al., 2015          |
|             | 184.5-185.5       | Poz-51948                             | Plant remains                       | AMS         | 4715 ± 35                                   | Yes                 | Kunes et al., 2015          |
|             | 252               | Beta377320                            | Pollen extract                      | AMS         | 9410 ± 40                                   | Yes                 | Kunes et al., 2015          |
|             | 280               | Poz-51949                             | Seeds of <i>Naja marina</i>         | AMS         | 9830 ± 60                                   | Yes                 | Kunes et al., 2015          |
|             | 362.5             | Beta377321                            | Pollen extract                      | AMS         | 12390 ± 50                                  | Yes                 | Kunes et al., 2015          |
|             | 372               | HV-1868                               | Bulk organic fraction               | BC          | 12260 ± 372                                 | Yes                 | Svobodová, 1992             |
|             | 417               | Poz-51952                             | Pollen extract                      | AMS         | 12890 ± 90                                  | Yes                 | Kunes et al., 2015          |
|             | 452               | Poz-51954                             | Plant remains                       | AMS         | 3410 ± 120                                  | No                  | Kunes et al., 2015          |
|             | 480               | Beta364949                            | Pollen extract                      | AMS         | 10880 ± 50                                  | No                  | Kunes et al., 2015          |
| 487-497     | HV-18599          | Bulk organic fraction containing sand | BC                                  | 10985 ± 355 | No                                          | Svobodová, 1992     |                             |

282

283 Table S7.1 Radiocarbon dates and relevant information used to construct updated age  
284 models for the pollen records of Švarcenberk Lake and Vracov in this study. AMS =  
285 Accelerator mass spectrometry; BC =Beta counting.

286

```

287 OxCal coding
288
289 Švarcenberk Lake
290
291 Plot()
292 {
293   Outlier_Model("General",T(5),U(0,4),"t");
294   P_Sequence("Svarcenberk",1,1,U(-2,2))
295   {
296     Boundary("Core base")
297     {
298       z=1000;
299     };
300     R_Date("LuA-4737",12800,120)
301     {
302       Outlier(0.05);
303       z=990;
304     };
305     R_Date("LuA-4738",11750,120)
306     {
307       Outlier(0.05);
308       z=681.5;
309     };
310     R_Date("LuA-4591",10780,115)
311     {
312       Outlier(0.05);
313       z=521.5;
314     };
315     R_Date("LuA-4590",9640,115)
316     {
317       Outlier(0.05);
318       z=391.5;
319     };
320     R_Date("LuA-4589",6350,100)
321     {
322       Outlier(0.05);
323       z=325.5;
324     };
325     R_Date("LuA-4588",4650,100)
326     {
327       Outlier(0.05);
328       z=151.5;
329     };
330     Boundary("Core top")
331     {
332       z=130;
333     };
334   };
335 };
336
337 Vracov
338
339 Plot()
340 {
341   Outlier_Model("General",T(5),U(0,4),"t");

```

```

342 P_Sequence("Vracov",1,1,U(-2,2))
343 {
344   Boundary("Core base")
345   {
346     z=495;
347   };
348   R_Date("Poz-51952",12890,90)
349   {
350     Outlier(0.05);
351     z=417;
352   };
353   R_Date("HV-1868",12260,372)
354   {
355     Outlier(0.05);
356     z=372;
357   };
358   R_Date("Beta377321",12390,50)
359   {
360     Outlier(0.05);
361     z=362.5;
362   };
363   R_Date("Poz-51949",9830,60)
364   {
365     Outlier(0.05);
366     z=280;
367   };
368   R_Date("Beta377320",9410,40)
369   {
370     Outlier(0.05);
371     z=252;
372   };
373   R_Date("Poz-51948",4715,35)
374   {
375     Outlier(0.05);
376     z=185;
377   };
378   R_Date("Poz-51947",1870,50)
379   {
380     Outlier(0.05);
381     z=125;
382   };
383   R_Date("Poz-51951",670,30)
384   {
385     Outlier(0.05);
386     z=40;
387   };
388   Boundary("Core top")
389   {
390     z=15;
391   };
392 };
393 };
394
395

```

396 **Supplementary references not in main reference list**

- 397 Bronk Ramsey C (2008). Deposition models for chronological records. *Quaternary Science*  
398 *Reviews* 27(1-2): 42-60.
- 399 Bronk Ramsey C (2009a) Bayesian analysis of radiocarbon dates. *Radiocarbon* 51: 337-  
400 360.
- 401 Bronk Ramsey, C., (2009b) Dealing with outliers and offsets in radiocarbon dating.  
402 *Radiocarbon* 51: 1023-1045.
- 403 Coutu AN, Whitelaw G, le Roux P, Sealy J. (2016) Earliest Evidence for the Ivory Trade in  
404 Southern Africa: Isotopic and ZooMS Analysis of Seventh–Tenth Century ad Ivory from  
405 KwaZulu-Natal. *African Archaeological Review* 33: 411–435.
- 406 Kuneš P, Abraham V, Kovářík O, Kopecký M, PALYCZ contributors (2009) Czech  
407 Quaternary Palynological Database — PALYCZ: review and basic statistics of the  
408 data. *Prelia* 81:209–238
- 409 Niedermeyer THJ, Strohal M (2012) mMass as a software tool for the annotation of cyclic  
410 peptide tandem mass spectra. *PLoS One* 7: e44913.
- 411 Sommer RS, Kalbe J, Ekström J, Benecke N, Liljegren R. (2014) Range dynamics of the  
412 reindeer in Europe during the last 25,000 years. *Journal of Biogeography* 41: 298-306.  
413 <https://doi.org/10.1111/jbi.12193>
- 414 Svobodová, H., 1992. Vývoj vegetace jižní Moravy během pozdním glaciálu a holocénu  
415 (Vegetation development of southern Moravia during the Late Glacial and Holocene)  
416 (Diss. thesis). Institute of Botany, AS CR, Pruhonic.
- 417 Welker F., Hajdinjak M., Talamo S., Jaouen K., Dannemann M., David F., Julien M., Meyer  
418 M., Kelso J., Barnes I., Brace S., Kamminga P., Fischer R., Kessler B.M., Stewart J.R.,  
419 Pääbo S., Collins M.J., Hublin J.-J. (2016) Palaeoproteomic evidence identifies archaic  
420 hominins associated with the Châtelperronian at the Grotte du Renne. *Proc. Natl.*  
421 *Acad. Sci. U. S. A.* 113: 11162–11167.
- 422 Zelinková M. (1998) Osteologický materiál z vnitřních prostor jeskyně Kůlny (Osteological  
423 material from the inside parts of the Kůlna cave). *Acta Mus. Moraviae, Sci. geol.*, 83:  
424 147-157.
- 425
